# Supplementary material
Source: PubMed Central journal article supplement (PMC4233133)
Supplement: NIHMS630092-supplement-1.pdf [file NIHMS630092-supplement-1.pdf]

## Supplemental Fig 1

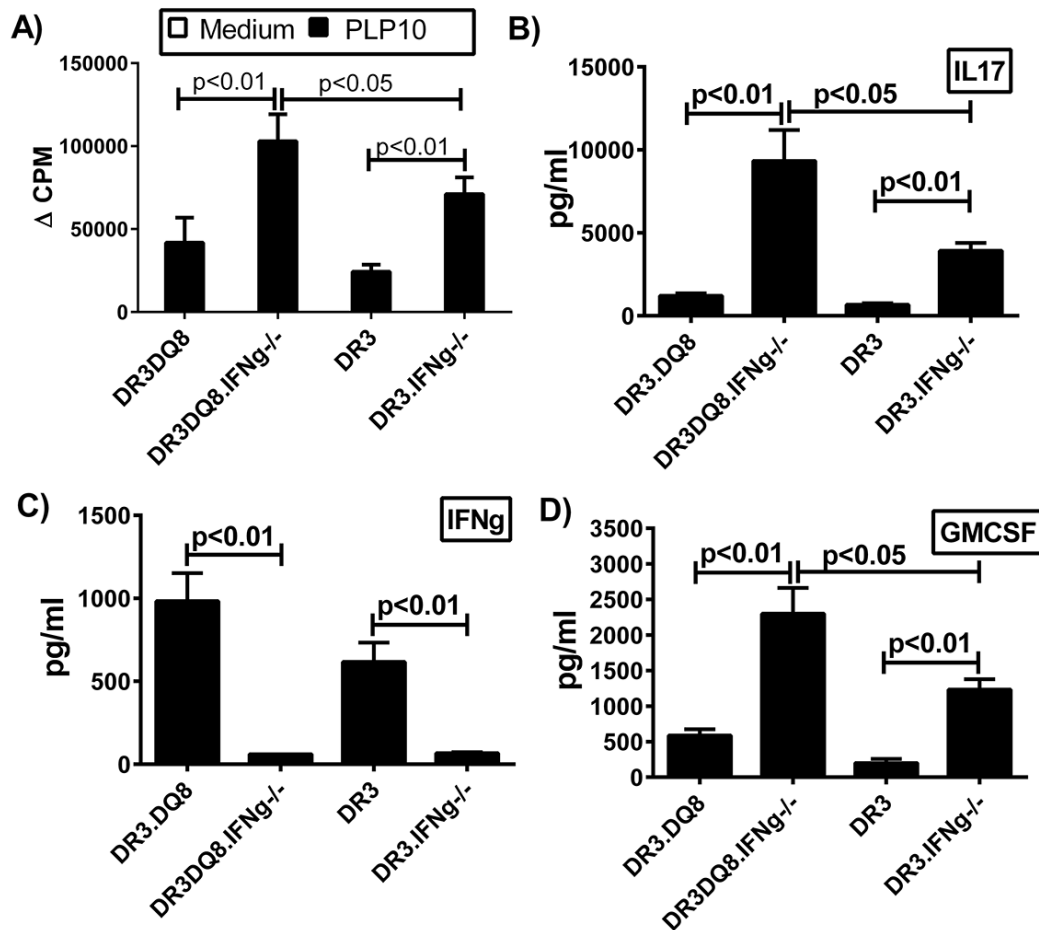

**Supple Fig 1. DRB1\*0301.DQ8.IFNγ<sup>-/-</sup> double Tg mice show Increased proliferation and production of pro-inflammatory mediators compared to DRB1\*0301.IFNγ<sup>-/-</sup> single Tg mice.** A) IFNγ-deficient DRB1\*0301.DQ8.IFNγ<sup>-/-</sup> showed stronger T-cell proliferation compared to DRB1\*0301.IFNγ<sup>-/-</sup> single Tg mice as well as IFNγ-sufficient DRB1\*0301 single and DRB1\*0301.DQ8<sup>-</sup> double Tg mice. For measurement of antigen specific T cell recall response, splenocytes were isolated from PLP<sub>91-110</sub> immunized DRB1\*0301, DRB1\*0301.IFNγ<sup>-/-</sup>, DRB1\*0301.DQ8, and DRB1\*0301.DQ8.IFNγ<sup>-/-</sup> Tg mice; and then cultured with or without (control) PLP<sub>91-110</sub> peptide for 48 h. The proliferative response was assessed by pulsing the cultures with [<sup>3</sup>H] thymidine for the last 16 h. The data are presented as the difference in CPM ± SD and are the average of three independent experiments. Among all the strains, DRB1\*0301.DQ8.IFNγ<sup>-/-</sup> with EAE showed highest levels of IL-17 (B) and GM-CSF (D). Although DRB1\*0301.IFNγ<sup>-/-</sup> Tg group showed higher levels of IL17 and GMCSF compared to DRB1\*0301 Tg mice, the levels were lower compared to DRB1\*0301.DQ8.IFNγ<sup>-/-</sup> Tg mice. As expected, only IFNγ-sufficient DRB1\*0301 single Tg and DRB1\*0301.DQ8 double Tg mice produce IFNγ (C), whereas no IFNγ was observed in either DRB1\*0301.IFNγ<sup>-/-</sup> Tg or DRB1\*0301.DQ8.IFNγ<sup>-/-</sup> Tg mice.

**Supplemental Table 1:** Heat-map of the protein and RNA levels of various cytokines, chemokines and chemokine receptors in different cells and tissues in IFN $\gamma$  sufficient with classical EAE and IFN $\gamma$  deficient mice with atypical EAE<sup>a</sup>.

|        | mRNA expression<br>(Realtime-PCR) |                                 |       |             |         | Protein (Bio-plex) |      |
|--------|-----------------------------------|---------------------------------|-------|-------------|---------|--------------------|------|
|        | BILS                              | SCILS                           | Brain | Spinal cord | CD4 RNA | CD4 protein        |      |
| IL1a   | 1.5                               | -1.5                            | 1     | 1           | 1       | 1                  | 1.39 |
| IL1b   | -6                                | -3                              | 10    | -2          | 2       | 2                  | 1.39 |
| IL3    | 5                                 | 1                               | 10    | 1           | 15      | 3                  | 3    |
| IL4    | 1                                 | -3                              | 1     | 20          | 1       | 1                  | -1.6 |
| IL5    | 7                                 | 2                               | 10    | 1           | 10      | 10                 | 2.02 |
| IL6    | 6                                 | 1                               | 16    | 1           | 11.3    | 1                  | 1.5  |
| IL10   | 1                                 | -16                             | 1     | 1           | 1       | 1                  | 1    |
| IL11   | 2.5                               | 1                               | 1     | 1           | 8.46    | 1                  | ND   |
| IL12a  | 1                                 | -6.4                            | 1     | -6          | 1       | 1                  | -1.8 |
| IL12b  | 1                                 | 1                               | 20    | 1           | 20      | 1                  | 1    |
| IL13   | 10                                | 1                               | 6     | 1           | 10.3    | 2.5                | 2.5  |
| IL15   | -5.2                              | 1                               | 1     | 1           | -9.12   | 1                  | 1    |
| IL17   | 6                                 | 3                               | 5     | -5          | 4.08    | 1.3                | 1.3  |
| IL22   | 5.9                               | 1                               | 10    | 10          | 5.6     | 1                  | 1    |
| IL23   | 5                                 | 1                               | 3     | 1           | 1       | 1                  | 1.2  |
| IFNg   | -20                               | -20                             | -10   | -20         | -20     | -20                | -20  |
| G-CSF  | 6                                 | 1                               | 12    | 2           | 8       | 1.5                | 1.5  |
| GMCSF  | 10                                | 1                               | 16    | 1           | 1       | 1.65               | 1.65 |
| TNFa   | 3                                 | 1                               | 5     | 1           | 30      | 3                  | 3    |
| MCP1   | 1                                 | -6                              | -10   | -25         | 1       | -4.1               | -4.1 |
| MIP1A  | 1                                 | 50                              | 10    | 1           | 10      | 1.52               | 1.52 |
| CCL5   | -4.2                              | -17.6                           | -10   | -20         | 1       | 1                  | 1    |
| CCL7   | ND                                | ND                              | 7     | -10         | 7.4     | ND                 | ND   |
| CCL8   | 1                                 | 7.57                            | 50    | -8          | 5       | ND                 | ND   |
| CCL11  | 2                                 | 3                               | 20    | 2.7         | 7.2     | ND                 | ND   |
| CCL17  | 3                                 | 2                               | 40    | 1           | 3       | ND                 | ND   |
| CCL19  | 3                                 | 1                               | 50    | 1           | 5       | ND                 | ND   |
| CCL21  | 1                                 | 1                               | 1     | 1           | 1       | ND                 | ND   |
| CCL22  | 1                                 | 1                               | 1     | 5           | 1       | ND                 | ND   |
| CCL27  | 2.2                               | 1                               | 1     | 1           | 1       | ND                 | ND   |
| CXCL9  | 1                                 | -4.2                            | 1.5   | -50         | 1       | ND                 | ND   |
| CXCL10 | -6.3                              | -27                             | 3     | -15         | 1       | ND                 | ND   |
| CXCL12 | 1                                 | -3.9                            | 1     | -50         | 1       | ND                 | ND   |
| CCR4   | 1                                 | 1                               | 7     | 1           | 8       | ND                 | ND   |
| CCR5   | 1                                 | -5                              | 1     | -2          | -10     | ND                 | ND   |
| CCR6   | 5                                 | 1                               | 2     | 1           | 15      | ND                 | ND   |
| CXCR2  | 3.9                               | 1                               | 4     | 1           | 20      | ND                 | ND   |
| CXCR3  | 1                                 | -10                             | 2     | -6          | -18     | ND                 | ND   |
| CXCR4  | 6                                 | 1                               | 6     | 1           | 18      | ND                 | ND   |
| CXCR6  | 1                                 | 1                               | 1     | 1           | 1       | 1                  | 1    |
|        |                                   | High in DR3DQ8.IFN $\gamma$ -/- |       |             |         |                    |      |
|        |                                   | High in DR3DQ8                  |       |             |         |                    |      |

<sup>a</sup>Protein levels of cytokine and chemokines were measured using mouse bio-plex assay as mentioned in method, where as mRNA expression was measured using gene specific primers from RealtimePCR.com. Cytokines and chemokine receptor expression were analyzed in RNA from CD4<sup>+</sup> T cells isolated from IFN $\gamma$ -deficient or sufficient mice using Real-time PCR. Expression levels were quantified using the threshold cycle (Ct) method normalized for the house keeping genes  $\beta$ -actin, GAPDH and HPRT. This table show fold changes of each chemical mediators in IFN $\gamma$  deficient mice over IFN $\gamma$  sufficient mice. Thus a positive value (red color) indicates the cytokine/chemokine is increased in IFN $\gamma$  deficient mice whereas a negative value (green color) means, it was higher in IFN $\gamma$  sufficient mice. Yellow color do not no significant changes.
